# Supplementary material for: Polymorphism of the Co–Te nanophases in mechanochemical synthesis
Source: Royal Society of Chemistry journal article supplement (doi:10.1039/d2ra05757c), 2022-01-01
Supplement: d2ra05757c1.pdf [file d2ra05757c1.pdf]

Supplemental Information on  
**Polymorphism of the Co-Te Nanophases in Mechanochemical Synthesis**

Marcelo Augusto Malagutti<sup>a,1</sup>, Vagner Zeizer Carvalho Paes<sup>b</sup>, Julian Geshev<sup>b</sup>, and Carlos Eduardo Maduro de Campos<sup>a\*</sup>

<sup>a</sup> *Laboratório de Síntese e Caracterização de nanoMateriais - Departamento de Física, Universidade Federal de Santa Catarina, 88040-900 Florianópolis – SC, Brazil*

<sup>b</sup> *Instituto de Física, Universidade Federal do Rio Grande do Sul, Porto Alegre 91501-970, Rio Grande do Sul, Brazil*

---

\*Corresponding author

*E-mail address:* [carlos.campos@ufsc.br](mailto:carlos.campos@ufsc.br)

<sup>1</sup> Current affiliation: Department of Civil, Environmental and Mechanical Engineering, University of Trento, via Mesiano 77, 38123 Trento, Italy.

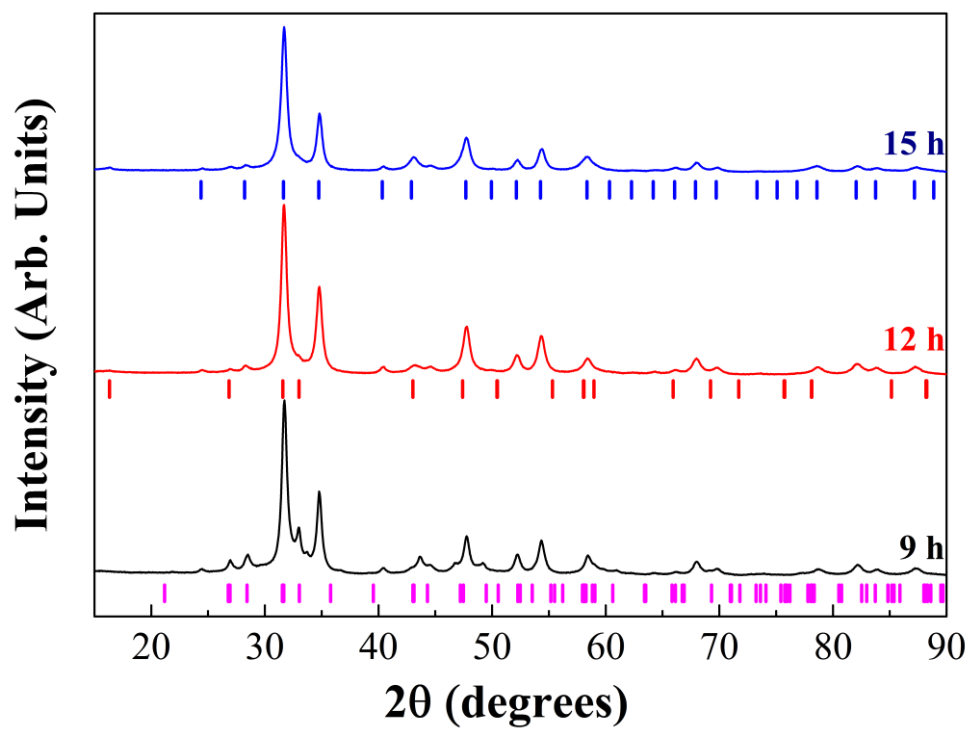

Figure S 1. Diffractograms obtained in the Bragg-Brentano reflection geometry, using a knife positioned above the sample to reduce the background. The time of milling is displayed in the right side, the tick marker colors correspond to red CoTe<sub>2</sub> P-3m1, magenta to γ-CoTe<sub>2</sub> Pnm, blue to the α-CoTe<sub>2</sub> Pa-3.

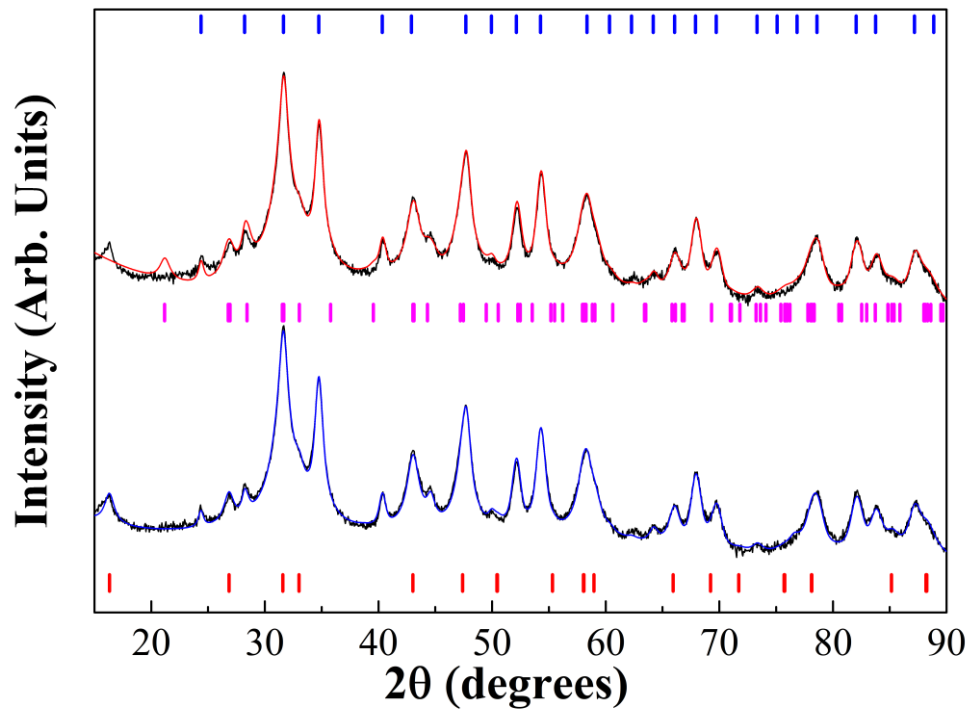

Figure S 2. Diffractogram of the  $\text{Co}_{32}\text{Te}_{68}$  15 h-milled sample with two different phase models: red curve uses the  $\alpha\text{-CoTe}_2$  Pa-3 (blue tick markers) and the  $\gamma\text{-CoTe}_2$  Pnnm (magenta tick markers); the blue curve uses the  $\text{CoTe}_2$  P-3m1 (red tick markers) instead of the latter. One can observe the misfit of the red curve signifying that the  $\gamma\text{-CoTe}_2$  phase cannot be present in the material. The tick marker colors correspond to red  $\text{CoTe}_2$  P-3m1, magenta to  $\gamma\text{-CoTe}_2$  Pnnm, blue to the  $\alpha\text{-CoTe}_2$  Pa-3.

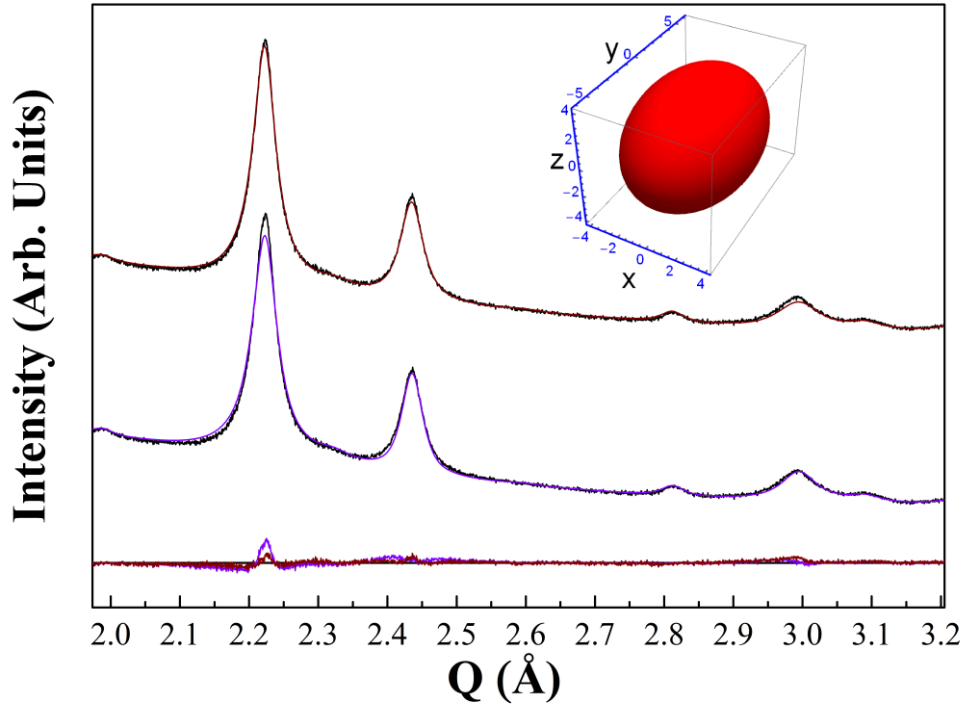

Figure S 3. Comparison of the DV and Anisotropic DV models for the L-NLS data. The ellipsoid radii are  $r_x=r_z=4.16(2)$  nm and  $r_y= 6.11(7)$  nm, with  $x$ -direction parallel to  $[1\ 0\ 0]$ .

| Parameters                  | Spherical | $r_x=r_z \neq r_y$ |
|-----------------------------|-----------|--------------------|
| $\mathcal{R}/\mathcal{R}_0$ | 1.088     | 1.0029             |
| $\nu_1$                     | 2         | 1                  |
| $\nu_2$                     | 45        | 45                 |
| $\alpha$ (%)                | 2.24      | 66.8               |

Table S 1. Hamilton test applied for the ellipsoidal and spherical shapes.

$\mathcal{R}/\mathcal{R}_0$  represents the ratio between the more restricted model over the less restrictive one.  $\mathcal{R}_0=R_{wp}=3.44$  when  $r_x \neq r_y \neq r_z$ .

$\nu_1$  means the difference between the number of parameters of the more restrictive model (spherical and  $r_x=r_z$  constraint) over the less restrictive

$v_2$  represents the number of reflections minus the number of parameters refined of the less restrictive model.

$\alpha$  is the probability of the less restrictive model being wrong, which generally uses a cut-off of 5%, meaning that values above that signify the more restrictive model is right, which is observed for the  $r_x=r_z$  case.

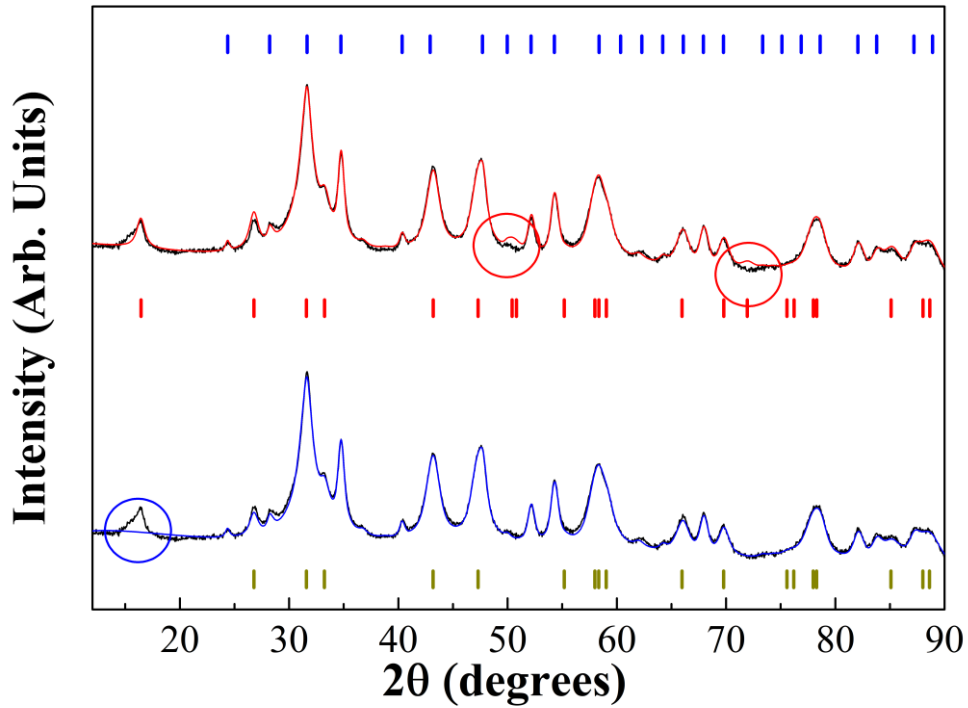

Figure S 4. Diffractograms of the  $\text{Co}_{40}\text{Te}_{60}$  15 h-milled sample with only two phases added. The red curve fits the  $\text{CoTe}_2$  P-3m1 (red tick markers) and Pa-3 (blue tick markers) phases, showing some misfitting close to  $2\theta$  50 and  $70^\circ$  (circled). The blue curve corresponds to the  $\beta$ -CoTe (yellow tick markers) and  $\text{CoTe}_2$  Pa-3 model, which does not show unexpected peaks although cannot describe the peak near  $2\theta$   $15^\circ$  (circled).

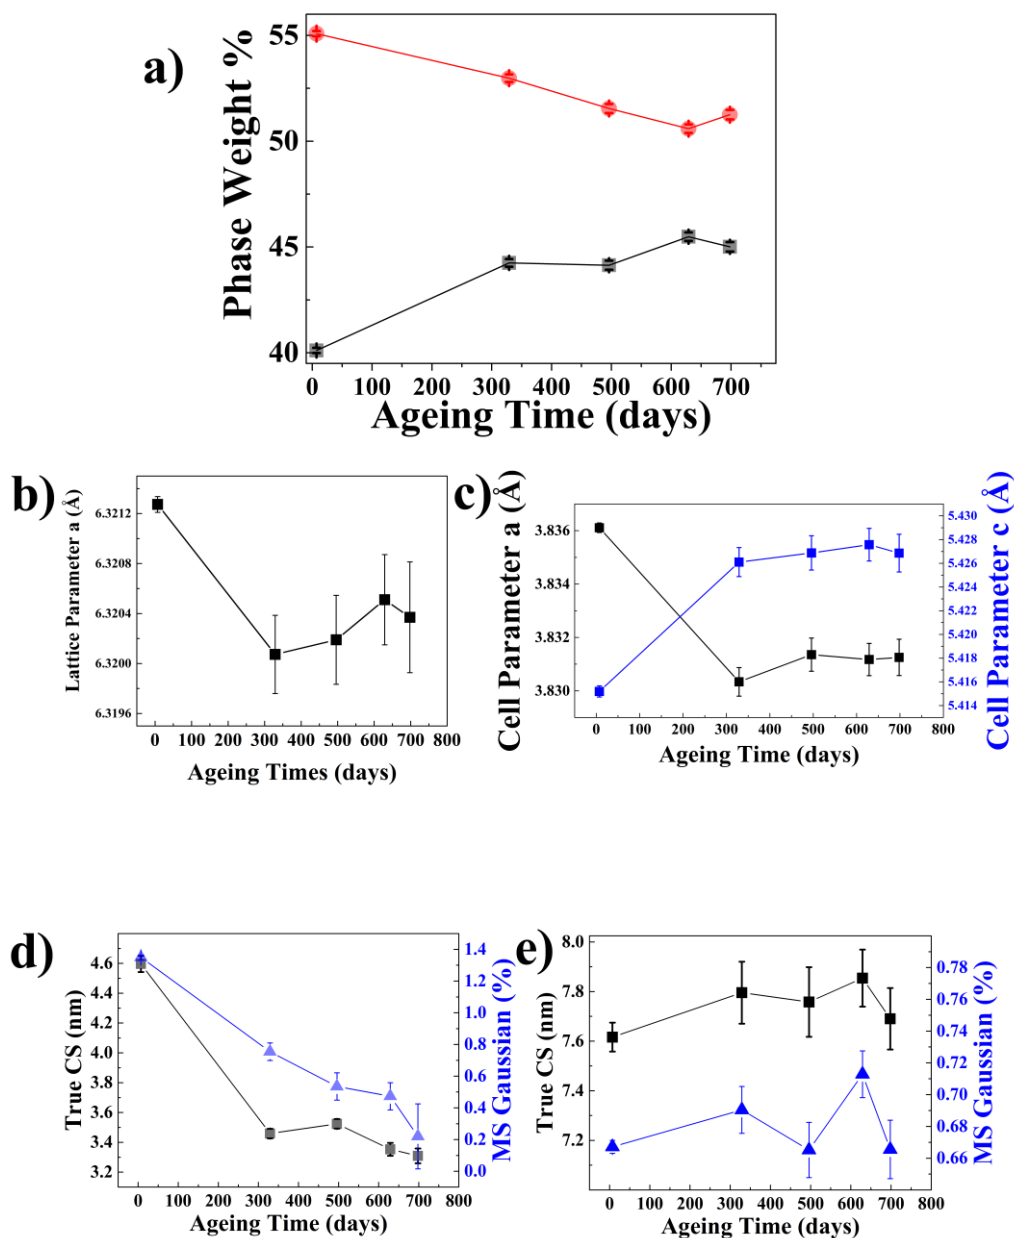

Figure S 5. Phase percentage, structural and microstructural information of the  $Co_{32}Te_{68}$  15 h-milled sample. The data used were collected using a knife to reduce the air scattering, apart from the first point, which used the synchrotron data. a) Phase weight percentage obtained with the anisotropic DV model. Red stands for  $CoTe_2$  Pa-3 phase and black for  $CoTe_2$  P-3m1. b) Lattice parameters of the  $CoTe_2$  Pa-3 phase. c) Cell parameters of the  $CoTe_2$  P-3m1 phase. d) Microstructural information of the P-3m1 structure. e) Microstructure of the Pa-3 phase.

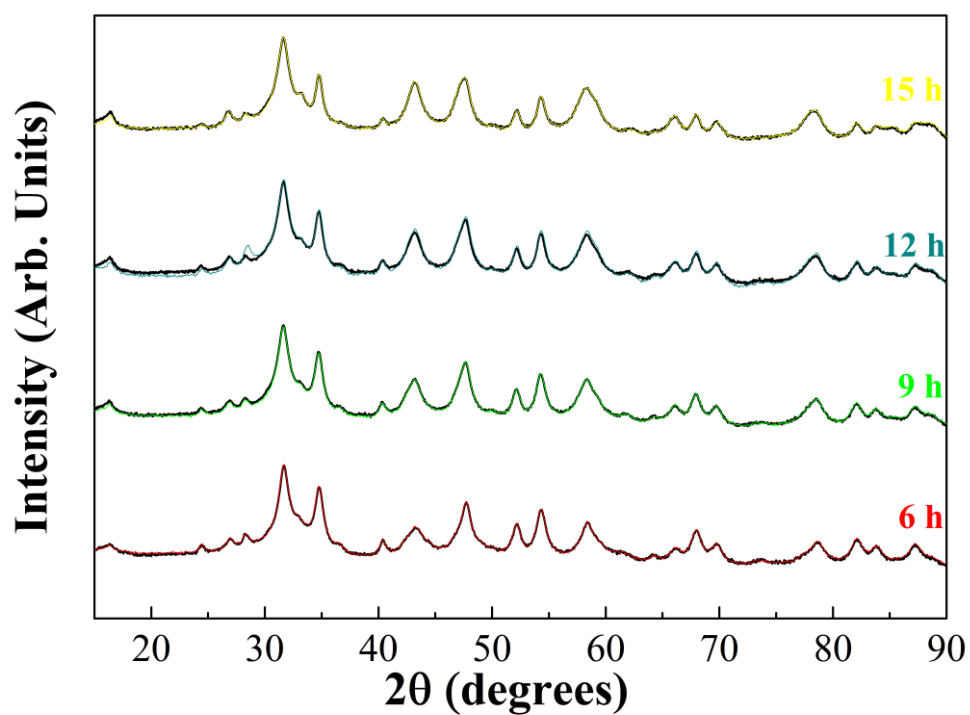

Figure S 6. Comparison of the diffractograms obtained after 10 months (black) of the synthesis and after 2 years (colored) for the  $\text{Co}_{40}\text{Te}_{60}$  samples. The exception is the 12 h-milled sample which was measured 6 months after the synthesis, with  $1^\circ$  of fixed divergent slits, which is the main cause of the intensity differences. No phase transition is observed and no big differences in the structural (peak positions) and microstructure (peak widths) are distinguishable.
